# Supplementary material for: Gradient oxygen doping triggered a microscale built-in electric field in CdIn2S4 for photoelectrochemical water splitting
Source: Royal Society of Chemistry journal article supplement (doi:10.1039/d3nr05609k), 2024-01-01
Supplement: d3nr05609k1.pdf [file d3nr05609k1.pdf]

## Supplementary Information

### **Gradient oxygen doping triggered a microscale built-in electric field in CdIn<sub>2</sub>S<sub>4</sub> for photoelectrochemical water splitting**

Jingwen Sun,<sup>‡\*</sup> Shangling Han,<sup>‡</sup> Fanglei Yao, Ruixin Li, Chenchen Fang, Xiaoyuan Zhang, Yaya Wang, Xuefeng Xu, Di Wu, Kai Liu, Pan Xiong and Junwu Zhu

Key Laboratory for Soft Chemistry and Functional Materials, Ministry of Education, Nanjing University of Science and Technology, Nanjing 210094, China

E-mail: Jingwen\_Sun@njust.edu.cn

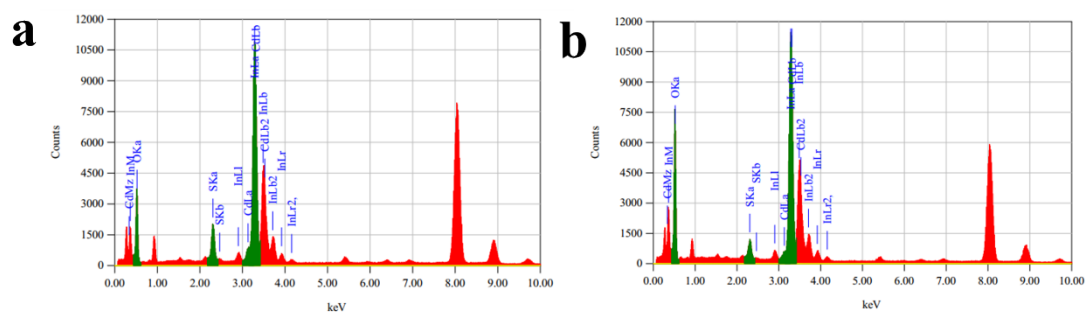

**Fig. S1.** The EDX spectra of (a) CIS and (b) OCIS.

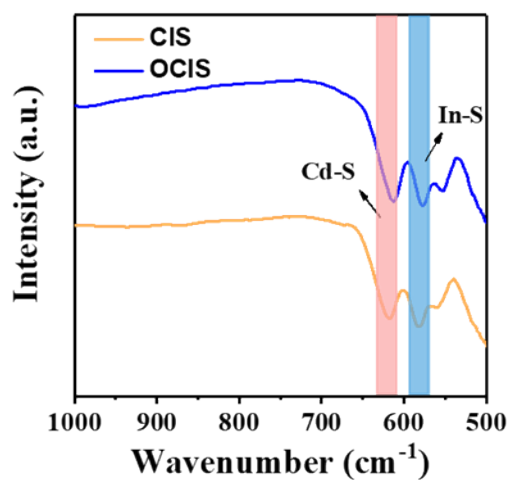

**Fig. S2.** The FTIR spectroscopy of CIS and OCIS.

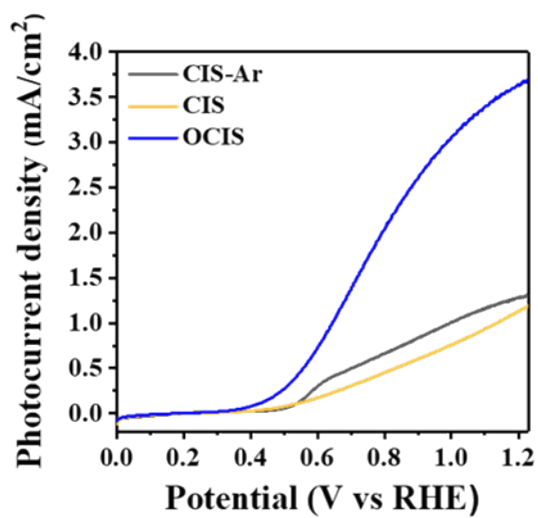

**Fig. S3.** LSV curves of CIS-Ar, CIS and OCIS.

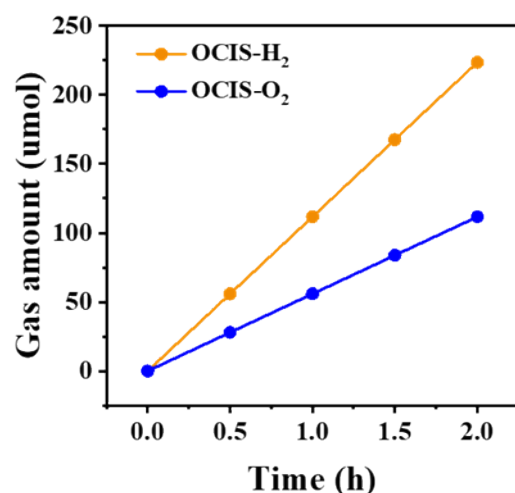

**Fig. S4.** Quantities of H<sub>2</sub> and O<sub>2</sub> evolution over OCIS catalyst.

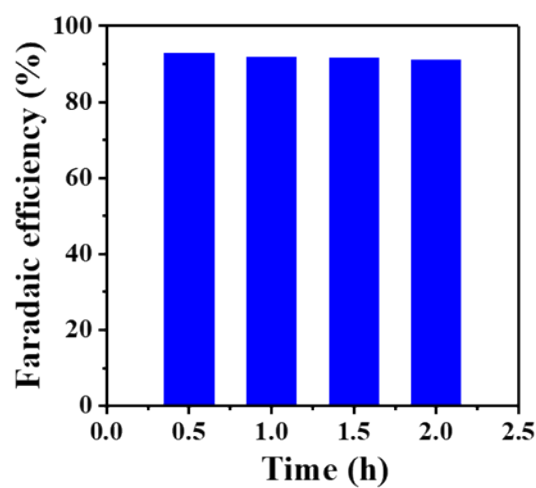

**Fig. S5.** Faradaic efficiencies of the O<sub>2</sub> production of OCIS.

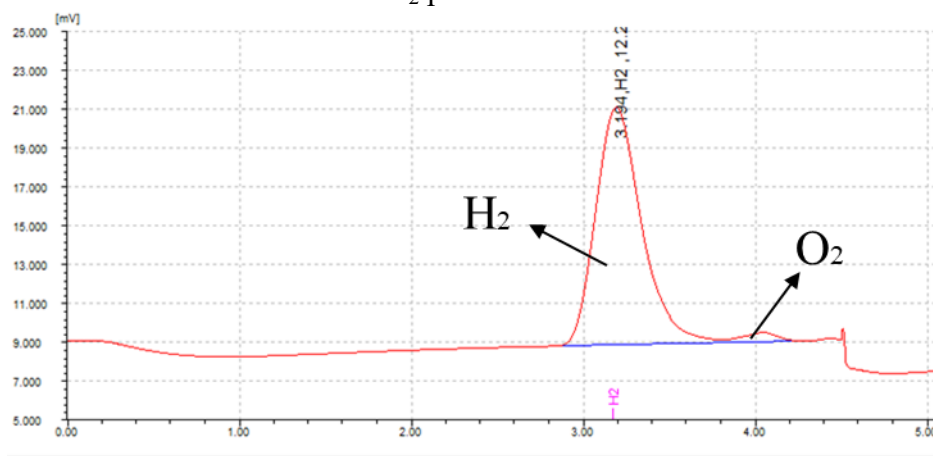

**Fig. S6.** Gas chromatogram of H<sub>2</sub> and O<sub>2</sub> under sacrificial agent.

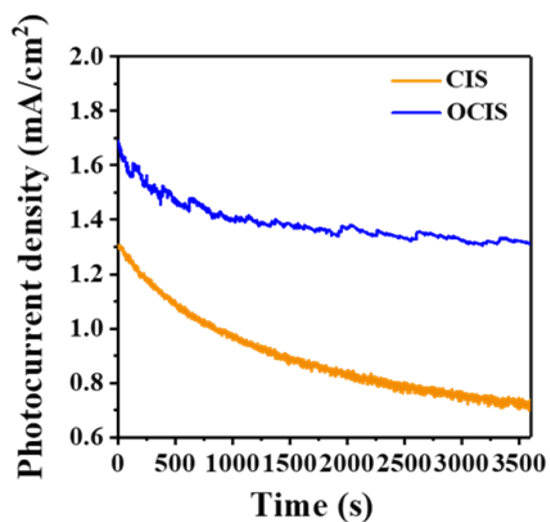

**Fig. S7.** Chronoamperometry tests of CIS and OCIS in the mixture of 0.25 M Na<sub>2</sub>S and 0.35 M Na<sub>2</sub>SO<sub>3</sub>.

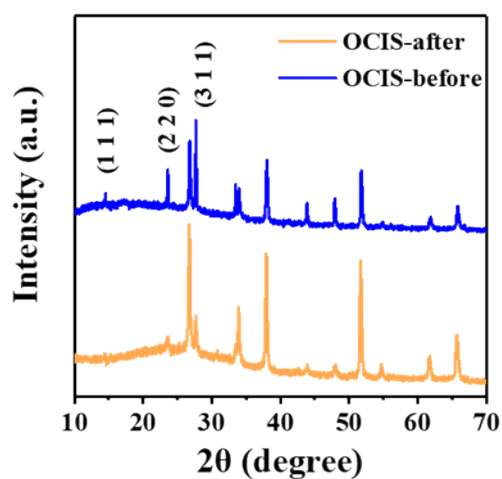

**Fig. S8.** XRD spectra of OCIS before and after chronoamperometry test.

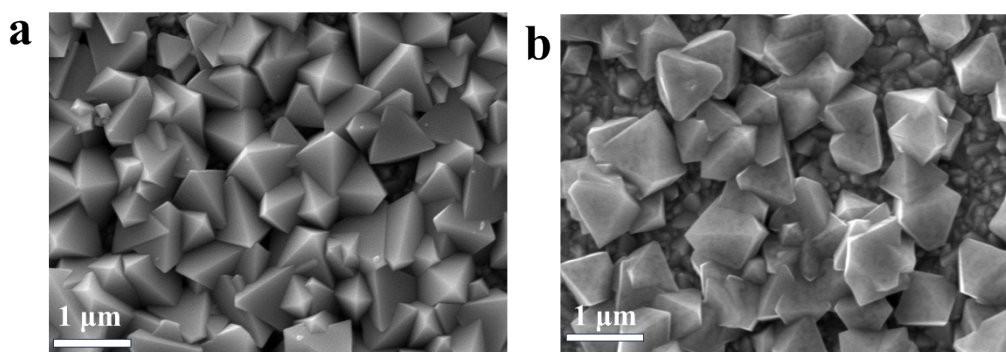

**Fig. S9.** The SEM images of OCIS (a) before, (b) after chronoamperometry test.

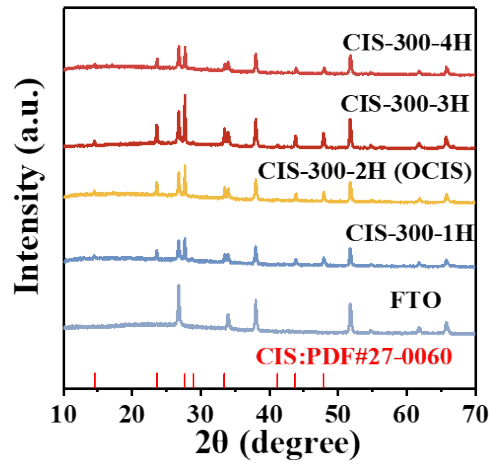

**Fig. S10.** XRD patterns of CIS annealed at 300 °C for different time.

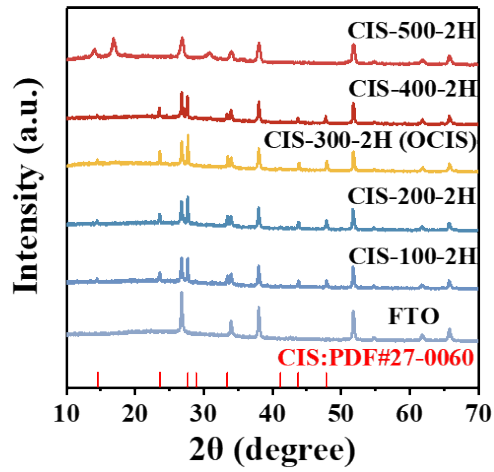

**Fig. S11.** XRD patterns of CIS annealed at 2 h for different temperatures.

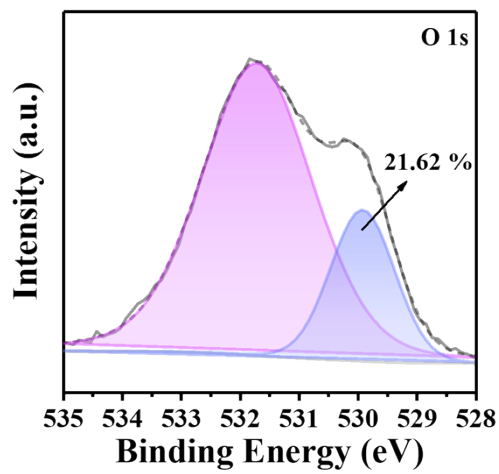

**Fig. S12.** The high-resolution XPS spectra of O1s in OCIS.

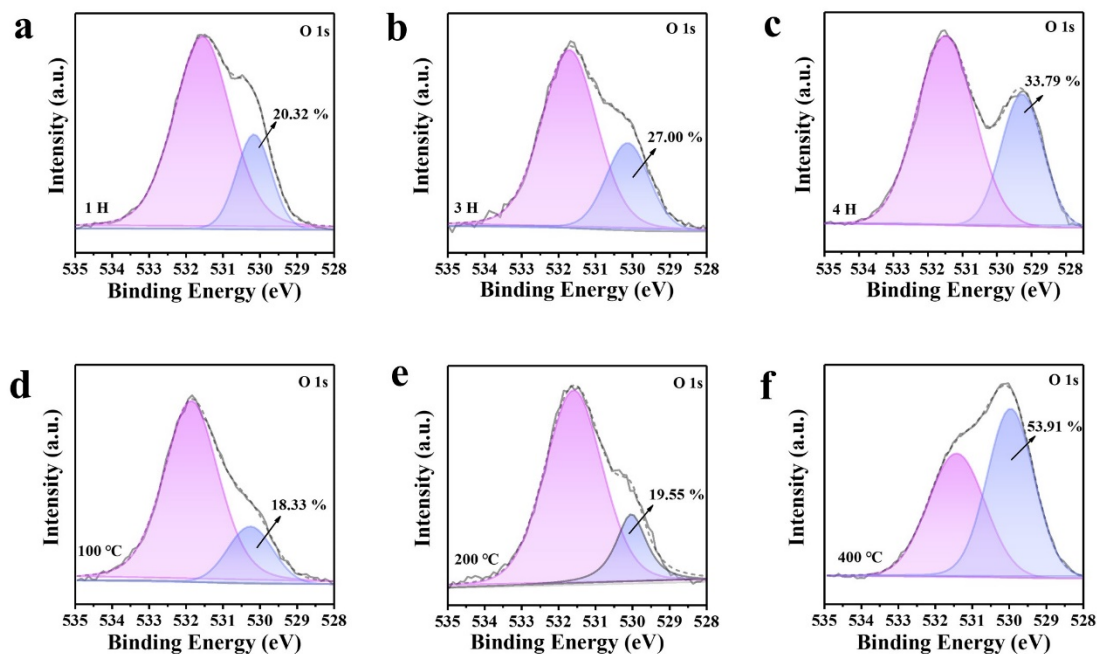

**Fig. S13.** The high-resolution XPS spectra of O 1s in CIS annealed at 300 °C for different time: (a) 1 h, (b) 3 h, (c) 4 h. XPS spectra of O 1s in CIS annealed for 2 h at different temperature (d) 100 °C, (e) 200 °C, (f) 400 °C.

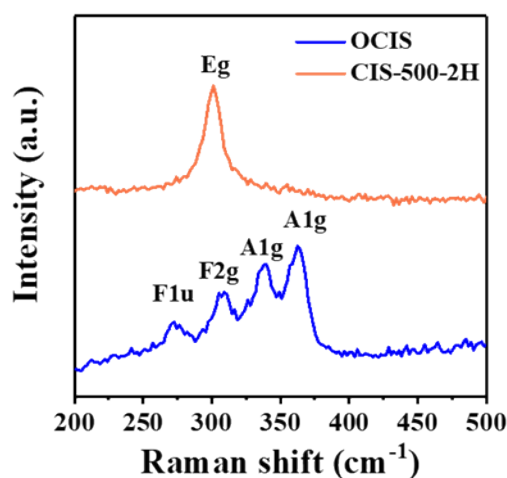

**Fig. S14.** Raman spectra of OCIS and CIS-500-2H.

Moreover, CIS-500-2H is further analyzed by Raman spectrum. In the range of 200-500  $\text{cm}^{-1}$ , there is an absence of any distinctive Raman peaks associated with CIS. The characteristic peak at 301  $\text{cm}^{-1}$  represents the stretching vibration of the Eg mode of  $\text{In}_2\text{O}_3$  (Fig. S14). This indicates that CIS has been completely oxidized at 500 °C, which is consistent with the XRD results.

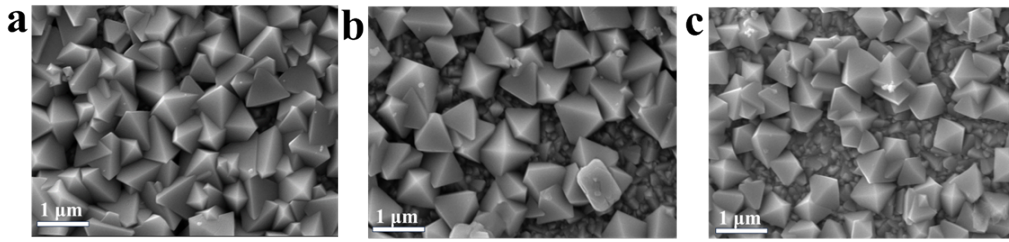

**Fig. S15.** The SEM images of (a) OCIS, (b) CIS-300-4H and (c) CIS-400-2H.

The morphological images of CIS-300-4H and CIS-400-2H are displayed in Fig. S15. In comparison with OCIS (Fig. S15a), even similar octahedral structure can be distinctly characterized, the homogeneity and crystallinity are more or less damaged along with the prolonged annealing time (Fig. S15b) or an increasing temperature (Fig. S15c). This phenomenon is unfavorable for the investigation of catalytic activity.

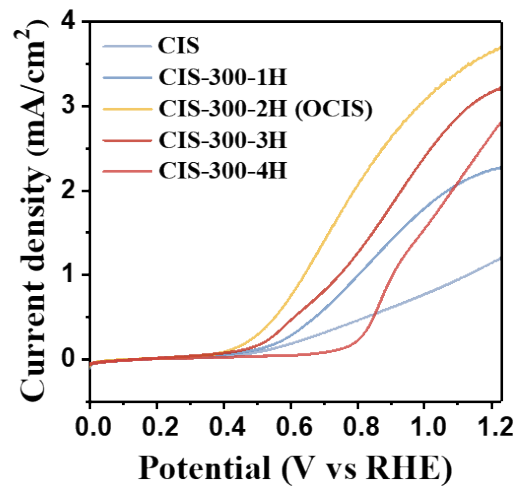

**Fig. S16.** LSV of CIS annealed at 300 °C for different time.

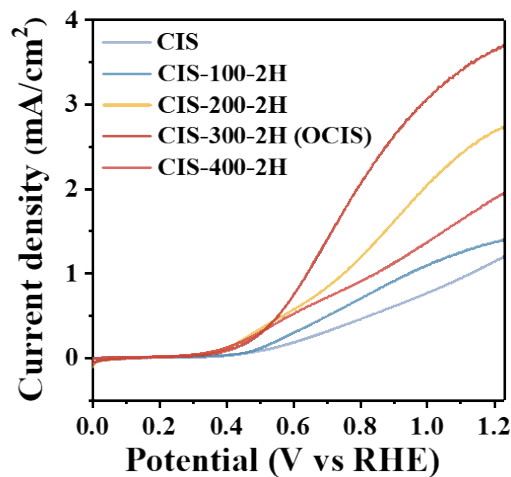

**Fig. S17.** LSV of CIS annealed for 2 h at different temperature.

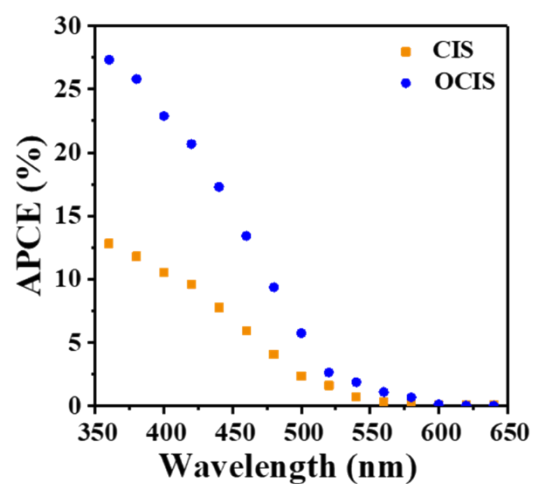

**Fig. S18.** The APCE of CIS and OCIS photoanodes.

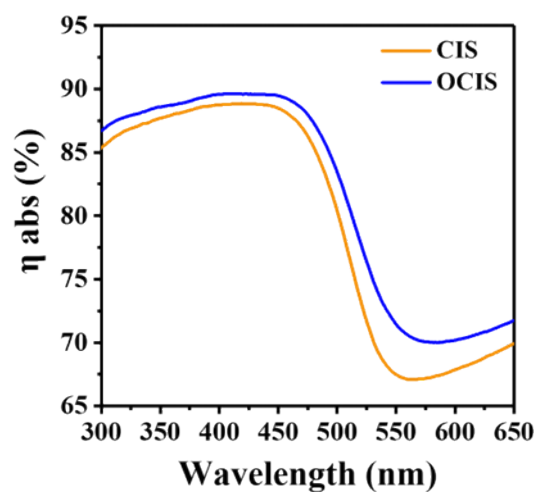

**Fig. S19.** Light absorption efficiency of CIS and OCIS.

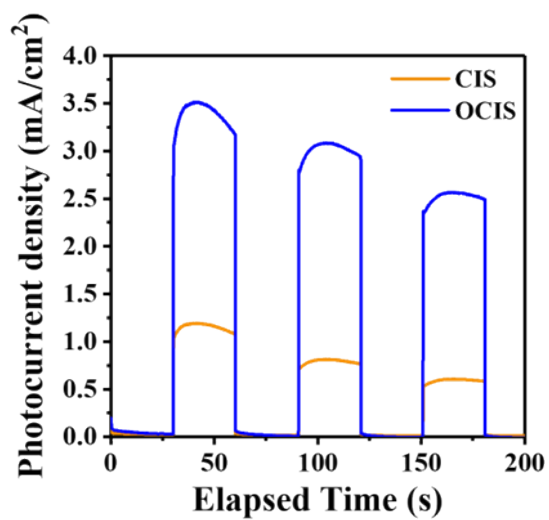

**Fig. S20.** Transient photocurrent response plots of CIS and OCIS.



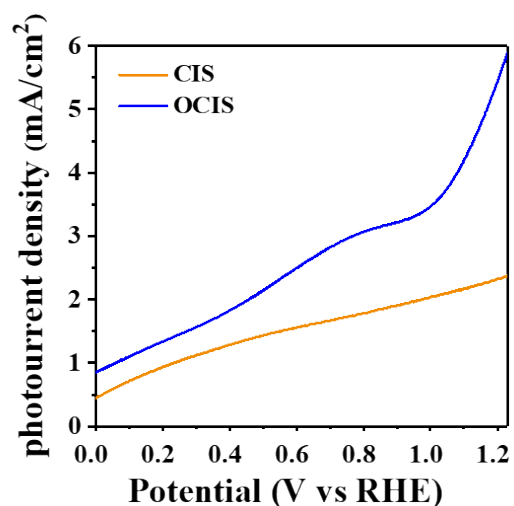

**Fig. S21.** LSV curves of CIS and OCIS in the mixture of 0.35 M  $\text{Na}_2\text{SO}_3$  and 0.25 M  $\text{Na}_2\text{S}$  (pH = 12.5).

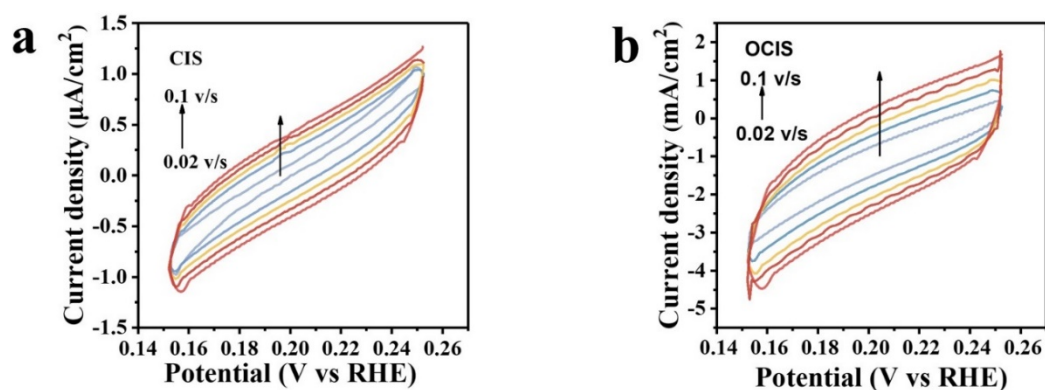

**Fig. S22.** Cyclic voltammogram measurements of (a) CIS and (b) OCIS at a scan rate ranging from 0.02-0.1 V/S.

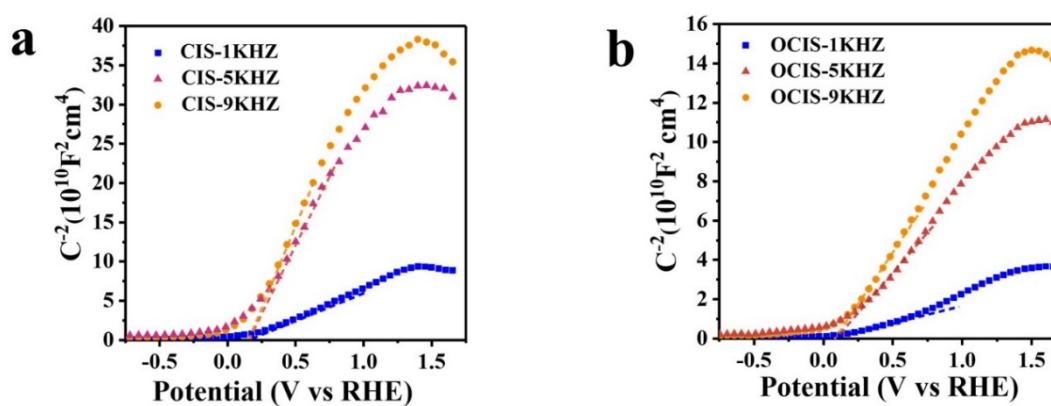

**Fig. S23.** M-S plots of (a) CIS and (b) OCIS in different frequencies.

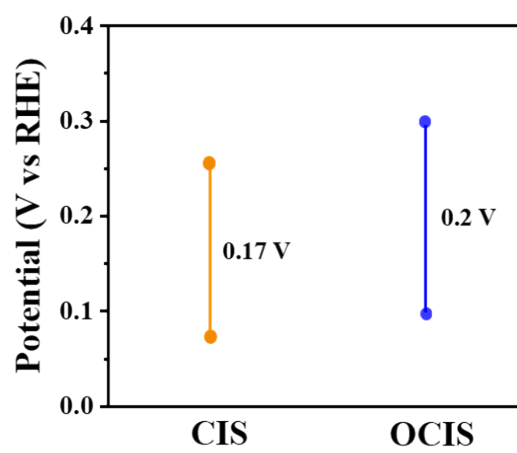

**Fig. S24.** OCP values of CIS and OCIS photoanodes.

**Table S1.** The PEC performance of reported metal sulfide based photoanodes.

| Photoanode                                                                         | Electrolyte                                           | J (mA/cm <sup>2</sup> vs 1.23V <sub>RHE</sub> ) | V <sub>onset</sub> (V <sub>RHE</sub> ) | Ref       |
|------------------------------------------------------------------------------------|-------------------------------------------------------|-------------------------------------------------|----------------------------------------|-----------|
| Vs-CdIn <sub>2</sub> S <sub>4</sub>                                                | Na <sub>2</sub> SO <sub>3</sub> and Na <sub>2</sub> S | 5.73                                            | ~ -0.15                                | [1]       |
| ZIS-O-S                                                                            | Na <sub>2</sub> SO <sub>4</sub>                       | 4.09                                            | 0.10                                   | [2]       |
| ZnIn <sub>2</sub> S <sub>4</sub> /CdS/ZnO                                          | Na <sub>2</sub> SO <sub>4</sub>                       | 3.48                                            | -0.03                                  | [3]       |
| CdIn <sub>2</sub> S <sub>4</sub> /InOx/NiFe-LDH                                    | KOH                                                   | 5.47                                            | ~ 0.12                                 | [4]       |
| ZIS-O-TS                                                                           | Na <sub>2</sub> SO <sub>4</sub>                       | 4.57                                            | -0.14                                  | [5]       |
| CIS/Ni-PPy                                                                         | Na <sub>2</sub> SO <sub>4</sub>                       | 6.07                                            | 0.19                                   | [6]       |
| CdIn <sub>2</sub> S <sub>4</sub> /In <sub>2</sub> S <sub>3</sub> /SnO <sub>2</sub> | Na <sub>2</sub> SO <sub>4</sub>                       | 2.98                                            | 0.02                                   | [7]       |
| SnS/SnS <sub>2</sub>                                                               | Na <sub>2</sub> SO <sub>4</sub>                       | 2.15                                            | 0.16                                   | [8]       |
| In <sub>2</sub> S <sub>3</sub> /TiO <sub>2</sub>                                   | KOH                                                   | 2.71                                            | /                                      | [9]       |
| WO <sub>3</sub> /In <sub>2</sub> S <sub>3</sub>                                    | Na <sub>2</sub> SO <sub>4</sub>                       | 1.60                                            | ~ 0.10                                 | [10]      |
| O-CIS                                                                              | Na <sub>2</sub> SO <sub>4</sub>                       | 3.69                                            | ~ 0.19                                 | This work |

**Table S2.** The summary of lattice oxygen content and performance of the prepared photoanodes.

| Sample            | Lattice oxygen content (%) | photocurrent density (mA/cm <sup>2</sup> ) |
|-------------------|----------------------------|--------------------------------------------|
| CIS-300-1H        | 20.32                      | 2.26                                       |
| CIS-300-2H (OCIS) | 21.62                      | 3.62                                       |
| CIS-300-3H        | 27.00                      | 3.17                                       |
| CIS-300-4H        | 53.91                      | 2.76                                       |
| CIS-100-2H        | 18.33                      | 1.38                                       |
| CIS-200-2H        | 19.55                      | 2.71                                       |
| CIS-400-2H        | 53.91                      | 1.94                                       |

**Table S3.** The summary of fitted data from the TRPL spectra.

|     | A1     | $\tau_1$ (ns) | A2    | $\tau_2$ (ns) | $\tau$ (ns) |
|-----|--------|---------------|-------|---------------|-------------|
| CIS | 514.46 | 0.79          | 37.25 | 44.27         | 35.62       |
| CIS | 500.16 | 0.74          | 32.58 | 47.30         | 38.28       |

**Table S4.** The summary of EIS fitted parameters of samples under illumination.

|      | Rs ( $\Omega$ ) | Rct (k $\Omega$ ) |
|------|-----------------|-------------------|
| CIS  | 20.8            | 2.5               |
| OCIS | 27.1            | 29.6              |

## References

- [1] H. Wang, Y. Xia, H. Li, X. Wang, Y. Yu, X. Jiao, D. Chen, *Nat. Commun.* 2020, 11, 3078
- [2] W. Xu, W. Gao, L. Meng, W. Tian, L. Li, *Adv. Energy Mater.* 2021, 2101181
- [3] W. Xu, W. Tian, L. Meng, F. Cao, L. Li, *Adv. Energy Mater.* 2021, 11, 2003500
- [4] H. Wang, Y. Xia, N. Wen, Z. Shu, X. Jiao, D. Chen, *Appl. Catal. B: Environ.* 2022, 300, 120717
- [5] L. Meng, M. Wang, H. Sun, Dr. W. Tian, Dr. F. Cao, Prof. L. Li, *Adv. Energy Mater.* 2022, 12, 2200629
- [6] W. Xu, L. Meng, W. Tian, S. Li, F. Cao, L. Li, *Small* 2022, 18, 2105240
- [7] L. Meng, M. Wang, H. Sun, W. Tian, C. Xiao, S. Wu, F. Cao, L. Li, *Adv. Mater.* 2020, 32, 2002893
- [8] L. Meng, X. Zhou, S. Wang, Y. Zhou, W. Tian, P. Kidkhunthod, S. Tunmee, Y. Tang, R. Long, Y. Xin, L. Li, *Angew. Chem. Int. Ed.* 2019, 58, 16668
- [9] J. Park, T. H. Lee, C. Kim, S. A. Lee, M. J. Choi, H. Kim, J. W. Yang, J. Lim, H. W. Jang, *Appl. Catal. B: Environ.* 2021, 295, 120276
- [10] W. Tian, C. Chen, L. Meng, W. Xu, F. Cao, L. Li, *Adv. Energy Mater.* 2020, 10, 1903951
